# Supplementary material
Source: publisher figshare collection journal article supplement (https://geolsoc.figshare.com/ndownloader/files/30667980)
Supplement: Supplementary file 1 [file 30667980]

|  |  |  |  |  |  |  |  |  |  |  |  |  |  |  |  |  |  |  |  |  |  |
| --- | --- | --- | --- | --- | --- | --- | --- | --- | --- | --- | --- | --- | --- | --- | --- | --- | --- | --- | --- | --- | --- |
| Labels | 206Pbc(1) | U | Th | Th/U | 238U/206Pb* (1) | | | 207Pb*/206Pb* (1) | | | 238U/206Pb* age (1) | | | 238U/206Pb* age (2) | | | 207Pb*/206Pb* age (1) | | | Disc (3) |  |
|  | (%) | (ppm) | (ppm) |  |  | | |  | | | (Ma) | | | (Ma) | | | (Ma) | | | (%) |  |
| D7_001 | 0.02 | 840 | 254 | 0.31 | 12.72 | ± | 0.15 | 0.0568 | ± | 0.0011 | 487.8 | ± | 5.7 | 487.8 | ± | 5.7 | 485 | ± | 43 | -0.58 |  |
| D7_002 | 0.00 | 334 | 226 | 0.69 | 8.52 | ± | 0.09 | 0.0641 | ± | 0.0012 | 715.5 | ± | 6.9 | 714.7 | ± | 6.9 | 747 | ± | 39 | 4.22 |  |
| D7_003 | 0.05 | 768 | 31 | 0.04 | 13.14 | ± | 0.15 | 0.0573 | ± | 0.0009 | 472.8 | ± | 5.1 | 472.3 | ± | 5.1 | 503 | ± | 36 | 6.01 |  |
| D7_004 | 1.34 | 329 | 319 | 1.00 | 6.78 | ± | 0.08 | 0.0635 | ± | 0.0028 | 887.2 | ± | 9.5 | 892.7 | ± | 9.3 | 726 | ± | 90 | -22.21 |  |
| D7_005 | 0.00 | 255 | 172 | 0.69 | 12.75 | ± | 0.15 | 0.0577 | ± | 0.0014 | 486.7 | ± | 5.4 | 486.2 | ± | 5.4 | 519 | ± | 52 | 6.22 |  |
| D7_006 | 0.22 | 90 | 78 | 0.89 | 2.07 | ± | 0.02 | 0.1578 | ± | 0.0027 | 2537.2 | ± | 25.0 | 2541.7 | ± | 24.7 | 2433 | ± | 29 | -4.28 |  |
| D7_007 | 0.17 | 258 | 39 | 0.16 | 13.28 | ± | 0.14 | 0.0561 | ± | 0.0019 | 468.0 | ± | 4.7 | 468.2 | ± | 4.7 | 456 | ± | 75 | -2.63 |  |
| D7_008 | 0.00 | 210 | 120 | 0.59 | 5.71 | ± | 0.07 | 0.0735 | ± | 0.0013 | 1040.5 | ± | 11.3 | 1040.5 | ± | 11.3 | 1029 | ± | 36 | -1.12 |  |
| D7_009 | 1.90 | 982 | 232 | 0.24 | 11.95 | ± | 0.13 | 0.0503 | ± | 0.0012 | 517.9 | ± | 5.4 | 522.6 | ± | 5.5 | 208 | ± | 57 | -148.99 |  |
| D7_010 | 0.09 | 255 | 73 | 0.29 | 5.58 | ± | 0.06 | 0.0740 | ± | 0.0016 | 1062.9 | ± | 10.5 | 1063.7 | ± | 10.4 | 1044 | ± | 43 | -1.81 |  |
| D7_011 | 0.00 | 84 | 36 | 0.44 | 5.48 | ± | 0.10 | 0.0712 | ± | 0.0022 | 1081.0 | ± | 19.0 | 1081.0 | ± | 19.0 | 964 | ± | 62 | -12.14 |  |
| D7_012 | 0.00 | 762 | 29 | 0.04 | 11.95 | ± | 0.13 | 0.0552 | ± | 0.0010 | 517.9 | ± | 5.5 | 517.9 | ± | 5.5 | 420 | ± | 38 | -23.32 |  |
| D7_013 | 0.18 | 560 | 49 | 0.09 | 13.63 | ± | 0.21 | 0.0553 | ± | 0.0014 | 456.5 | ± | 6.9 | 456.9 | ± | 6.9 | 425 | ± | 55 | -7.40 |  |
| D7_014 | 0.02 | 532 | 126 | 0.24 | 2.18 | ± | 0.02 | 0.1615 | ± | 0.0012 | 2438.5 | ± | 21.7 | 2431.5 | ± | 21.8 | 2472 | ± | 13 | 1.36 |  |
| D7_015 | 0.00 | 264 | 133 | 0.52 | 21.95 | ± | 0.35 | 0.0493 | ± | 0.0016 | 287.2 | ± | 4.5 | 287.2 | ± | 4.5 | 165 | ± | 75 | -74.03 |  |
| D7_016 | 0.16 | 1077 | 296 | 0.28 | 12.79 | ± | 0.13 | 0.0562 | ± | 0.0012 | 485.3 | ± | 4.6 | 485.6 | ± | 4.6 | 461 | ± | 46 | -5.26 |  |
| D7_017 | 0.15 | 820 | 69 | 0.09 | 7.53 | ± | 0.10 | 0.0771 | ± | 0.0009 | 803.7 | ± | 10.1 | 793.5 | ± | 10.0 | 1125 | ± | 23 | 28.56 |  |
| D7_018 | 0.19 | 330 | 324 | 1.01 | 140.55 | ± | 3.87 | 0.0548 | ± | 0.0093 | 45.7 | ± | 1.3 | 45.3 | ± | 1.2 | 406 | ± | 340 | 88.74 |  |
| D7_019 | 0.00 | 733 | 28 | 0.04 | 13.83 | ± | 0.27 | 0.0609 | ± | 0.0012 | 450.0 | ± | 8.6 | 447.4 | ± | 8.5 | 635 | ± | 43 | 29.14 |  |
| D7_020 | 0.00 | 451 | 56 | 0.13 | 13.54 | ± | 0.18 | 0.0551 | ± | 0.0012 | 459.2 | ± | 6.0 | 459.2 | ± | 6.0 | 419 | ± | 46 | -9.60 |  |
| D7_021 | 0.35 | 620 | 255 | 0.42 | 13.30 | ± | 0.17 | 0.0539 | ± | 0.0015 | 467.4 | ± | 5.9 | 468.8 | ± | 5.9 | 369 | ± | 61 | -26.67 |  |
| D7_022 | 0.00 | 508 | 52 | 0.11 | 13.31 | ± | 0.17 | 0.0585 | ± | 0.0012 | 467.0 | ± | 5.7 | 465.8 | ± | 5.7 | 551 | ± | 45 | 15.25 |  |
| D7_023 | 0.00 | 336 | 28 | 0.09 | 12.44 | ± | 0.18 | 0.0545 | ± | 0.0014 | 498.5 | ± | 7.0 | 498.5 | ± | 7.0 | 378 | ± | 56 | -31.87 |  |
| D7_024 | 0.77 | 135 | 140 | 1.07 | 12.97 | ± | 0.21 | 0.0641 | ± | 0.0047 | 478.9 | ± | 7.3 | 474.8 | ± | 7.1 | 747 | ± | 149 | 35.88 |  |
| D7_025 | 0.03 | 522 | 37 | 0.07 | 12.85 | ± | 0.17 | 0.0563 | ± | 0.0013 | 483.0 | ± | 6.3 | 483.1 | ± | 6.2 | 465 | ± | 50 | -3.87 |  |
| D7_026 | 0.01 | 1067 | 72 | 0.07 | 13.62 | ± | 0.16 | 0.0553 | ± | 0.0009 | 456.6 | ± | 5.1 | 456.7 | ± | 5.1 | 423 | ± | 36 | -7.95 |  |
| D7_027 | 0.00 | 580 | 41 | 0.07 | 11.62 | ± | 0.14 | 0.0544 | ± | 0.0010 | 532.1 | ± | 6.2 | 532.1 | ± | 6.2 | 390 | ± | 40 | -36.43 |  |
| D7_028 | 2.75 | 430 | 66 | 0.16 | 8.34 | ± | 0.13 | 0.0607 | ± | 0.0018 | 730.2 | ± | 11.1 | 733.1 | ± | 11.1 | 630 | ± | 62 | -15.90 |  |
| D7_029 | 0.00 | 162 | 104 | 0.66 | 12.37 | ± | 0.20 | 0.0541 | ± | 0.0017 | 501.2 | ± | 7.9 | 501.2 | ± | 7.9 | 378 | ± | 69 | -32.58 |  |
| D7_030 | 0.00 | 1128 | 308 | 0.28 | 8.03 | ± | 0.10 | 0.0651 | ± | 0.0007 | 756.7 | ± | 8.5 | 756.1 | ± | 8.5 | 778 | ± | 23 | 2.74 |  |
| D7_031 | 0.00 | 300 | 30 | 0.10 | 12.53 | ± | 0.17 | 0.0560 | ± | 0.0014 | 495.1 | ± | 6.6 | 495.1 | ± | 6.6 | 454 | ± | 56 | -9.06 |  |
| D7_032 | 0.25 | 218 | 147 | 0.69 | 10.76 | ± | 0.14 | 0.0536 | ± | 0.0033 | 572.8 | ± | 7.0 | 574.2 | ± | 6.8 | 438 | ± | 60 | -30.78 |  |
| D7_033 | 0.77 | 1002 | 528 | 0.54 | 15.41 | ± | 0.28 | 0.0489 | ± | 0.0019 | 405.3 | ± | 7.1 | 408.2 | ± | 7.1 | 142 | ± | 88 | -185.40 |  |
| D7_034 | 0.36 | 249 | 123 | 0.51 | 10.11 | ± | 0.26 | 0.0705 | ± | 0.0032 | 608.3 | ± | 15.0 | 601.0 | ± | 14.9 | 944 | ± | 89 | 35.56 |  |
| D7_035 | 0.05 | 401 | 368 | 0.94 | 5.52 | ± | 0.06 | 0.0757 | ± | 0.0022 | 1073.8 | ± | 11.5 | 1073.3 | ± | 11.4 | 1088 | ± | 56 | 1.30 |  |
| D7_036 | 0.11 | 463 | 36 | 0.08 | 12.95 | ± | 0.14 | 0.0559 | ± | 0.0013 | 479.6 | ± | 4.9 | 480.1 | ± | 4.9 | 451 | ± | 51 | -6.35 |  |
| D7_037 | 0.00 | 169 | 83 | 0.50 | 5.62 | ± | 0.07 | 0.0727 | ± | 0.0014 | 1055.4 | ± | 11.8 | 1055.4 | ± | 11.8 | 1007 | ± | 37 | -4.81 |  |
| D7_038 | 1.54 | 847 | 201 | 0.24 | 11.27 | ± | 0.11 | 0.0480 | ± | 0.0013 | 548.0 | ± | 5.1 | 554.9 | ± | 5.2 | 98 | ± | 61 | -459.20 |  |
| D7_039 | 0.17 | 212 | 105 | 0.51 | 4.56 | ± | 0.06 | 0.0774 | ± | 0.0032 | 1277.3 | ± | 15.9 | 1279.2 | ± | 15.5 | 1133 | ± | 79 | -12.74 |  |
| D7_040 | 0.00 | 713 | 199 | 0.29 | 12.72 | ± | 0.13 | 0.0572 | ± | 0.0009 | 488.0 | ± | 4.8 | 487.8 | ± | 4.8 | 500 | ± | 36 | 2.40 |  |
| D7_041 | 0.00 | 496 | 59 | 0.12 | 1.87 | ± | 0.02 | 0.1840 | ± | 0.0014 | 2767.1 | ± | 29.1 | 2767.2 | ± | 29.1 | 2691 | ± | 12 | -2.83 |  |
| D7_042 | 0.00 | 1062 | 3 | 0.00 | 226.20 | ± | 3.78 | 0.0429 | ± | 0.0025 | 28.4 | ± | 0.5 | 28.4 | ± | 0.5 |  |  |  |  |  |
| D7_043 | 0.00 | 912 | 118 | 0.13 | 5.91 | ± | 0.07 | 0.0724 | ± | 0.0008 | 1007.0 | ± | 10.4 | 1007.0 | ± | 10.4 | 997 | ± | 22 | -1.01 |  |
| D7_044 | 0.19 | 327 | 114 | 0.36 | 10.60 | ± | 0.14 | 0.0564 | ± | 0.0020 | 581.1 | ± | 7.4 | 582.2 | ± | 7.3 | 469 | ± | 77 | -23.91 |  |
| D7_045 | 0.10 | 793 | 151 | 0.19 | 12.83 | ± | 0.12 | 0.0578 | ± | 0.0012 | 483.7 | ± | 4.4 | 483.1 | ± | 4.4 | 524 | ± | 46 | 7.69 |  |
| D7_046 | 0.00 | 185 | 111 | 0.61 | 3.19 | ± | 0.04 | 0.1038 | ± | 0.0013 | 1759.3 | ± | 19.9 | 1759.3 | ± | 19.9 | 1694 | ± | 23 | -3.85 |  |
| D7_047 | 0.00 | 729 | 37 | 0.05 | 12.39 | ± | 0.16 | 0.0560 | ± | 0.0010 | 500.3 | ± | 6.1 | 500.3 | ± | 6.1 | 451 | ± | 41 | -10.93 |  |
| D7_048 | 0.00 | 789 | 43 | 0.06 | 12.15 | ± | 0.13 | 0.0567 | ± | 0.0009 | 509.8 | ± | 5.2 | 509.8 | ± | 5.2 | 482 | ± | 37 | -5.77 |  |
| D7_049 | 0.00 | 350 | 240 | 0.70 | 7.48 | ± | 0.09 | 0.0669 | ± | 0.0012 | 808.4 | ± | 9.0 | 807.6 | ± | 9.0 | 837 | ± | 37 | 3.41 |  |
| D7_050 | 0.00 | 412 | 137 | 0.34 | 12.83 | ± | 0.15 | 0.0571 | ± | 0.0012 | 483.7 | ± | 5.3 | 483.5 | ± | 5.4 | 497 | ± | 45 | 2.68 |  |
| D7_051 | 0.04 | 371 | 26 | 0.07 | 13.66 | ± | 0.18 | 0.0594 | ± | 0.0016 | 455.4 | ± | 5.7 | 453.6 | ± | 5.7 | 582 | ± | 59 | 21.76 |  |
| D7_052 | 0.00 | 749 | 75 | 0.10 | 12.90 | ± | 0.14 | 0.0571 | ± | 0.0010 | 481.4 | ± | 5.2 | 481.2 | ± | 5.2 | 498 | ± | 39 | 3.33 |  |
| Errors are 1-sigma; Pbc and Pb* indicate the common and radiogenic portions, respectively. | | | | | | | | | | | |  |  |  |  |  |  |  |  |  |  |
| (1) Common Pb corrected by assuming 206Pb/238U-208Pb/232Th age-concordance | | | | | | | | | | |  |  |  |  |  |  |  |  |  |  |  |
| (2) Common Pb corrected by assuming 206Pb/238U-207Pb/235U age-concordance | | | | | | | | | |  |  |  |  |  |  |  |  |  |  |  |  |
| (3) The degree of discordance for an analyzed spot indicates the chronological difference between the two ages determined by Pb–Pb and U–Pb methods, and is defined as {1-(238U/206Pb* age)/(207Pb*/206Pb* age)}×100 (%) (e.g., Song et al., 1996). | | | | | | | | | | | | | | | | | | | | |  |
